# Supplementary material
Source: HighWire-hosted journal article supplement (https://tsaco.smart01.highwire.org/content/3/1/e000202)
Supplement: inline-supplementary-material-1 [file inline-supplementary-material-1.pdf]

**Search language, designed for use in Pubmed:**

1.1:

("Wounds and Injuries"[Mesh]) AND ("patient reported" [tw] OR "Patient Reported Outcome Measures" [mesh] OR "patient-reported" [tw] OR "quality of life" [mesh] OR "quality of life" [tw] OR qol [ti] OR "activities of daily living" [mesh] OR proms [tw] OR "patient reported outcome measures" [tw] OR biopsychosocial [tw] OR "psychometrics" [mesh] OR psychometr\* [ti] ) AND (english [lang] NOT ("animals" [mesh] NOT "humans" [mesh])) AND ("1985/01/01"[PDat] : "2015/12/31"[PDat]))

1.2:

(wounds and injuries[mesh:noexp]) AND English[lang] AND ("1985/01/01"[PDat] : "2015/12/31"[PDat])

1.3:

((("patient reported"[tw] OR "Patient Reported Outcome Measures"[mesh] OR "patient-reported"[tw] OR "quality of life"[mesh] OR "quality of life"[tw] OR qol[ti] OR "activities of daily living"[mesh] OR proms[tw] OR "patient reported outcome measures"[tw] OR biopsychosocial[tw] OR "psychometrics"[mesh] OR psychometr\*[ti]) AND (english[lang] NOT ("animals"[mesh] NOT "humans"[mesh])) AND ("1985/01/01"[PDat] : "2015/12/31"[PDat]))
